1            Computed tomography reveals hip  
2                            dysplasia in *Smilodon*:  
3            Implications for social behavior in an  
4                            extinct Pleistocene predator  
5

6    Mairin A. Balisi<sup>1,2\*</sup>, Abhinav K. Sharma<sup>3</sup>, Carrie M. Howard<sup>1</sup>, Christopher A.  
7    Shaw<sup>1,4</sup>, Robert Klapper<sup>5</sup>, Emily L. Lindsey<sup>1</sup>  
8

9    <sup>1</sup> La Brea Tar Pits and Museum, Natural History Museum of Los Angeles County,  
10    Los Angeles, California, United States of America

11    <sup>2</sup> School of Natural Sciences, University of California, Merced, California, United  
12    States of America

13    <sup>3</sup> David Geffen School of Medicine, University of California, Los Angeles,  
14    California, United States of America

15    <sup>4</sup> Idaho Museum of Natural History, Idaho State University, Pocatello, Idaho, United  
16    States of America

17    <sup>5</sup> Orthopaedics, Cedars Sinai Medical Group, Los Angeles, California, United  
18    States of America  
19

20    \* Corresponding author

21    E-mail: [mbalisi@tarpits.org](mailto:mbalisi@tarpits.org)  
22  
23  
24

## 25 **Abstract**

26           Reconstructing the behavior of extinct species is challenging, particularly for  
27 those with no living analogues. However, damage preserved as paleopathologies on  
28 bone can record how an animal moved in life, potentially reflecting patterns of behavior.  
29 Here, for the first time, we use computed tomography (CT) to assess hypothesized  
30 etiologies of pathology in a pelvis and associated right femur of an adult *Smilodon*  
31 *fatalis* saber-toothed cat, one of the best-studied mammal species from the Pleistocene-  
32 age Rancho La Brea asphalt seeps, Los Angeles, California. The pelvis exhibits  
33 massive destruction of the right acetabulum that previously was interpreted, for nearly a  
34 century, to have resulted from trauma and infection. We evaluated this historical  
35 interpretation using CT imaging to supplement gross morphology in identifying  
36 symptoms of traumatic, infective, or degenerative arthritis. We found that the pathologic  
37 distortions are inconsistent with degenerative changes that started only later in life, as in  
38 the case of infective or traumatic arthritis. Rather, they characterize chronic remodeling  
39 that began at birth and led to degeneration of the joint over time. These findings suggest  
40 that this individual suffered from hip dysplasia, a congenital condition common in  
41 domestic dogs and cats.

42           The individual examined in this study reached adulthood (at least four to seven  
43 years of age) but never could have hunted properly nor defended territory on its own. As  
44 such, this individual, and other critically pathologic *Smilodon* like it, likely survived to  
45 adulthood by association with a social group that assisted it with feeding and protection.  
46 The pathologic specimens examined here in detail are consistent with a spectrum of  
47 social strategies in *Smilodon* supported by a predominance of previous studies. This

48 application of a relatively new and interdisciplinary technique to an old question  
49 therefore informs the longstanding debate between social and solitary hypotheses for  
50 the behavior of an extinct predator.

51

## 52 **Introduction**

53 The saber-toothed cat *Smilodon fatalis* is one of the most well-studied apex  
54 predators from the late Pleistocene epoch, if not across the entire history of fossil  
55 mammals [1]. Much of our knowledge about this species comes from the Rancho La  
56 Brea asphalt seeps in Los Angeles, California, United States, which selectively trapped  
57 and preserved thousands of individuals of *Smilodon* from at least 50,000 years ago until  
58 the species' extinction approximately 11,000 years ago [1]. The seeps functioned as a  
59 carnivore trap: a large herbivore stuck in the asphalt inadvertently would attract large  
60 carnivores and scavengers, which themselves would become entrapped in great  
61 numbers [2]. Studies of *Smilodon* at Rancho La Brea have enabled reconstruction of its  
62 feeding behavior as an ambush predator specializing on herbivorous megafauna,  
63 inferences derived using independent approaches ranging from comparative  
64 morphology (e.g. [3]) to stable isotopes (e.g. [4]). As well, the abundant specimens  
65 include numerous examples of healed injuries, or pathologies [5]. Paleopathologies  
66 preserved as skeletal lesions are a phenomenon that tends to be rare at more typical  
67 fossil sites that do not involve preservation in asphalt, do not exhibit a carnivore bias, or  
68 generally have undergone different taphonomic processes; but this phenomenon is  
69 captured by Rancho La Brea's large sample sizes.

70 As bone remodels throughout an animal's life in response to stress, strain, and  
71 injury [6–9], paleopathologies can preserve a record of realized behavior and  
72 supplement the picture of potential behavior presented by skeletal morphology.  
73 Differences in the distribution of pathologies throughout the skeleton, for example,  
74 distinguish *Smilodon* from a contemporaneous predator, the dire wolf *Canis dirus*,  
75 reflecting differences between the two species in hunting behavior and potential prey  
76 preference corroborated by independently gathered data (e.g. [4]). While injuries in dire  
77 wolves tended to be concentrated around its distal limbs, supporting the hypothesis that  
78 it was a pursuit predator, *Smilodon's* injuries tended to cluster around the midline of its  
79 body, supporting inferences that it ambushed and grappled with prey [5]. As the  
80 aggregate result of how an animal moved over the course of its life, pathologies present  
81 a relatively direct record of the animal's interactions with its prey, its environment, and  
82 even its conspecifics—including, potentially, intraspecific interactions such as agonistic  
83 behavior and sociality.

84 Sociality, the degree to which individuals live with conspecifics in groups or  
85 societies [10], is difficult to infer in *Smilodon* given that it has no direct living analogues.  
86 Estimated to have weighed between 160 and 350 kg [3,11], *Smilodon* was at least the  
87 size of the Siberian tiger (*Panthera tigris altaica*), the largest extant felid; some  
88 estimates reach 369 to 469 kg, placing *Smilodon* in the range of the largest extant  
89 ursids [12,13]. No felid living today has *Smilodon's* elongate, knife-like canines or stocky  
90 and powerful build. As well, *Smilodon* (of the extinct felid lineage Machairodontinae) is  
91 distantly related to extant large felids (Felinae), introducing further uncertainty. Based  
92 on its robust morphology (e.g. [14,15]) and on evidence from stable isotopes (e.g. [4]), it

93 likely stalked and ambushed its prey; therefore, it may have been similar to the African  
94 lion (*Panthera leo*), which has a similar hunting strategy and is social [16]. Yet sociality  
95 varies across mammalian species, including among members of a single genus; other  
96 extant pantherines like tigers (*Panthera tigris*) are solitary [17], complicating inferences  
97 of behavior based on ancestral reconstructions. Advocates of the solitary-cat hypothesis  
98 cite *Smilodon*'s small relative brain size determined using endocranial casts [18] as  
99 evidence of solitary behavior, because sociality exerts high cognitive demands [19,20].  
100 However, compared to ungulates and primates, carnivores have tended to decouple  
101 sociality and relative brain size, so that a smaller braincase does not necessitate a lack  
102 of sociality [21]. The gregarious-cat hypothesis has drawn support from the high ratios  
103 of *Smilodon* relative to prey at Rancho La Brea [14,22,23] (although detractors point out  
104 that some extant large cats aggregate at kills and carcasses despite otherwise being  
105 solitary [20]) and from comparisons between Rancho La Brea and playback  
106 experiments used to estimate carnivore abundance in Africa, which suggest that the  
107 densities of *Smilodon* at Rancho La Brea are more consistent with it having been social  
108 rather than solitary [24,25]. The lack of size sexual dimorphism in *Smilodon* relative to  
109 living or fossil lions has supported monogamy rather than polygynous breeding in  
110 *Smilodon*, if the saber-tooth did have a social structure [26]. Most relevant to the current  
111 study, the existence of healed injuries in *Smilodon* also has been interpreted as  
112 evidence for social behavior, with the assumption that recovering from serious injury  
113 would be difficult if not impossible without cooperative sociality [27].

114         The current study centers on a *Smilodon* specimen (LACMHC 131) that has  
115 earned the distinction of being “the most strikingly pathological object in the collection of

116 Rancho La Brea fossils” [22]. The specimen is a right innominate bone exhibiting  
117 massive distortion and destruction of the hip socket (Figure 1). Moodie [22], restricted in  
118 1930 to an inspection of the gross morphology, regarded this specimen as having been  
119 infected following violent trauma, possibly during an encounter with a conspecific, which  
120 also led to dislocation of the femur from the hip. Moodie found no pathologic bones  
121 potentially associated with the injured innominate; because of disarticulation by flowing  
122 asphalt over thousands of years, associated elements are rarely encountered at  
123 Rancho La Brea. However, after over half a century, Shermis [23] described a  
124 pathologic femur (LACMHC 6963; Figure 2) associated with another pathologic pelvis.  
125 Later, this femur was determined to be associated instead with the Moodie specimen  
126 [27], enabling examination of the effects of a single injury on associated skeletal  
127 elements using newer technology.

128 **Fig 1.** Photographs of LACMHC 131, a pathologic pelvis belonging to *Smilodon*  
129 *fatalis*. **(A)** Lateral view of right side showing destruction of the acetabulum;  
130 anterodorsal end to the right. **(B)** Lateral view of left side showing the intact acetabulum  
131 but exostoses around the anterodorsal acetabular rim; anterodorsal end to the left. **(C)**  
132 Dorsal and **(D)** ventral views showing asymmetry in the pelvis; anterior end to the right.

133 **Fig 2.** Photographs of LACMHC 6963, a pathologic right femur belonging to  
134 *Smilodon fatalis*. **(A)** Anterior and **(B)** posterior views of full femur, excluding the distal  
135 epiphysis, which was broken after death; proximal end on the left. **(C)** Anterior and **(D)**  
136 posterior close-up views of the proximal end. **(E)** Dorsal close-up view of the femoral  
137 head, greater trochanter, and lesser trochanter in lower center background. **(F)** Lateral  
138 close-up view of the greater trochanter and lesser trochanter (lower center), which is

139 enlarged into a round knob. The upper scale bar refers to A and B and the lower scale  
140 bar refers to C, D, E, and F.

141 In the present study, we supplement gross morphology and analyze LACMHC  
142 131 and 6963 using computed tomography, observing, for the first time, the internal  
143 bone structure of a pathologic non-primate mammal. We evaluate the historical  
144 inference that the injury was the result of trauma and assess different etiologies of  
145 pathology: traumatic arthritis, infective arthritis, or degenerative arthritis. Finally, we  
146 explore the implications of the diagnosis on reconstructions of sociality in *Smilodon* and  
147 the potential contribution of paleopathology to a growing interdisciplinary body of  
148 literature supporting sociality in this extinct predator.

149

## 150 **Materials and Methods**

151 All specimens examined are from the collections of the La Brea Tar Pits and  
152 Museum, part of the Los Angeles County Natural History Museum (LACM), Los  
153 Angeles, California. Different fossiliferous asphaltic deposits (which became manmade  
154 “pits” during the historical excavation process) at Rancho La Brea had different periods  
155 of asphalt seep activity, thus entrapping organisms over different timespans over the  
156 past 55,000 years with varied depositional environments and taphonomic histories. In  
157 this context, we reduced potential variability in these factors by selecting all specimens  
158 from a single deposit, Pit 61/67. Pit 61/67 is the most recent deposit at Rancho La Brea  
159 that precedes the late Pleistocene megafaunal extinctions at around 11,000 years  
160 before present [28], at which point *Smilodon fatalis* became extinct.

161           We examined the external surfaces of the pathologic pelvis including the right  
162 innominate (LACMHC 131) and associated pathologic right femur (LACMHC 6963). As  
163 specimens for comparison, we inspected an unassociated non-pathologic right femur  
164 (LACMHC K-3232) and a non-pathologic pelvis (LACMHC K-2584) from the same  
165 deposit and of similar sizes and ontogenetic stages as the pathologic specimens. Initial  
166 surface scanning of all specimens was carried out using an Artec Space Spider (Artec  
167 3D) as a means of digital preservation and to provide a 3D visual with color. The  
168 surface scans were processed in Artec Studio 12 and fused into a model with a  
169 resolution of 0.2 mm. CT imaging of LACMHC 131, 6963, and K-3232 was performed at  
170 the S. Mark Taper Foundation Imaging Center, Los Angeles, California, on a GE  
171 Revolution (GE Healthcare, Waukesha, WI) 256-slice scanner with 0.625 mm slice  
172 thickness. Imaging parameters were KVP=120, mA=300, 0.5 second rotation time, and  
173 0.51 pitch using a medium body FOV. The data were acquired in the axial plane,  
174 reformatted into soft tissue and bone algorithms, and viewed in the axial, coronal and  
175 sagittal planes. CT images were converted to 3D models using the segmentation  
176 software Mimics (Materialise). Geomagic Freeform (3D Systems) was used to upload  
177 and determine placement of the plane for cross-sections of the 3D reconstructions.

178           No permits were required for the described study, which complied with all  
179 relevant regulations.

180



## 181 **Results**

182 LACMHC 131 is a pathologic but complete pelvis with all sutures completely  
183 fused (Figure 1; File S1; Movie S1). The distal end of LACMHC 6963, the pathologic  
184 femur, is broken and missing (Figure 2; File S1), precluding verification of distal  
185 epiphyseal fusion. However, the proximal epiphyses are completely fused to the shaft,  
186 and the size of the femur is comparable to large adult femora belonging to other  
187 *Smilodon* preserved at Rancho La Brea. Therefore, the *Smilodon* individual represented  
188 by these two specimens is inferred to have been of adult age.

189 There are no signs of callus, or bone regeneration and healing, that typically are  
190 seen on imaging following fracture. Rather, the osteophytes are likely a sign of bone  
191 remodeling secondary to malformation of the joint with subsequent necrosis. The  
192 changes in the right acetabulum and right femur are consistent with those expected  
193 from repetitive subluxation and subsequent necrosis. The right acetabulum is shallow  
194 and elliptical-shaped as opposed to concentric-shaped. A hole in the bone, likely the  
195 result of posthumous asphaltic wear based on its sharp edges, marks the thin medial  
196 wall of the acetabulum, which is lined otherwise with exostoses. The left acetabulum  
197 appears non-pathologic; however, the ilium anterodorsal to the acetabulum—origin of  
198 the quadriceps femoris muscles—bears rugose ridges (Figure 1; File S1, Movie S1)  
199 absent on typical *Smilodon* pelvic specimens (Figure 3). The head of the pathologic  
200 right femur is flattened and laden with anatomical distortions; as well, the lesser  
201 trochanter is enlarged into a round knob (Figure 2; File S1). The non-pathologic right  
202 femur, the comparative specimen, bears a round head that is appropriately developed  
203 (Figure 4), fitting snugly into a concentric-shaped socket such as the left acetabulum of

204 the pathologic pelvis or either acetabulum of the non-pathologic pelvis (Figure 3) and  
205 thereby allowing for an axis of rotation and movement expected for *Smilodon* to function  
206 normally.

207 **Fig 3.** Photographs of LACMHC K-2584, a non-pathologic pelvis belonging to  
208 *Smilodon fatalis*. **(A)** Lateral view of right side; anterodorsal end to the right. **(B)** Lateral  
209 view of left side; anterodorsal end to the left. **(C)** Dorsal and **(D)** ventral views; anterior  
210 end to the right.

211 **Fig 4.** Photographs of LACMHC K-3232, a non-pathologic right femur belonging  
212 to *Smilodon fatalis*. **(A)** Anterior and **(B)** posterior views of full femur; proximal end on  
213 the left. **(C)** Anterior and **(D)** posterior close-up views of the proximal end, including the  
214 spherical femoral head, greater trochanter, and lesser trochanter. **(E)** Dorsal close-up  
215 view of the femoral head, greater trochanter, and lesser trochanter in lower center  
216 background. **(F)** Lateral close-up view of the greater trochanter and lesser trochanter  
217 (lower center). The upper scale bar refers to A and B and the lower scale bar refers to  
218 C, D, E, and F.

219 The four cardinal findings of arthritis on imaging are bony sclerosis, osteophytes,  
220 joint space narrowing, and subchondral cysts. The CT images of the pathologic  
221 specimens reveal evidence of degenerative changes in the right hip joint and a lack of  
222 fractures from traumatic impact (Movie S2; Datasets S1-S3). The images demonstrate  
223 findings of sclerosis and osteophytes in both the right acetabulum and femoral head,  
224 which are changes consistent with degenerative arthritis. Profuse remodeling with  
225 osteophyte formation marks the right femoral head, likely in response to the  
226 degenerative process from repeated subluxation and dysplasia.

227

## 228 **Discussion**

### 229 **Diagnosis**

230           The arthritic degeneration seen in the pathologic specimens and visualized on  
231 CT imaging must have arisen from one of three etiologies: traumatic arthritis, infective  
232 arthritis, or degenerative arthritis. Findings on the specimens make the etiologies of  
233 infective arthritis or traumatic arthritis less likely. In the case of infective arthritis, the  
234 presupposition is that the specimen developed typically before an insult that led to  
235 infection and subsequent obliteration of the hip joint. This assumption also holds true for  
236 the case of a traumatic arthritis etiology following an injury or fracture.

237           However, the anatomical distortions of the right femoral head, in conjunction with  
238 the obliteration of the right acetabulum seen in the gross specimens as well as on CT  
239 imaging, suggest chronic changes that led to degeneration over time (Figure 2). The  
240 degeneration of the head of the femur as seen would not be expected if the etiology of  
241 degenerative change in the hip joint were due to infection or trauma, as the  
242 development of the pelvis and femur presumably would have been complete before the  
243 insult or injury occurred during the adult cat's life.

244           Instead, the condition of the right acetabulum and right femoral head  
245 demonstrates anatomy consistent with developmental distortion. Typically, the head of  
246 the femur develops in conjunction with the acetabulum of the pelvis [29]. The spherical  
247 femoral head fits into the concentric-shaped acetabulum to form a ball-and-socket joint  
248 that enables a four-legged creature to ambulate normally, lie down, sit down, stand up,

249 and function without subluxation, or displacement, of the femoral head out of the pelvic  
250 socket [29]. In developmental hip dysplasia, however, the acetabulum of the pelvis does  
251 not develop appropriately, which subsequently affects the development of the head of  
252 the femur [29]. An elliptical acetabulum, as opposed to concentric-shaped, causes  
253 continual subluxation of the femoral head, which can result in coxa plana, or necrosis of  
254 the bony nucleus of the femoral head. This subsequent coxa plana produces flattening  
255 and degeneration of the normally spherical femoral head [30].

256         Proper anatomical development and ossification of the hip joint rely on  
257 continuous and symmetrical pressure of the femoral head on the acetabulum, and  
258 dysplasia results from improper positioning of the femoral head within the acetabulum  
259 [29,31]. Dysplastic hips are characterized by a pathologic restructuring of the hip and  
260 accelerated remodeling of the joint in response to abnormal forces and tensions that  
261 create stress. This produces formation of new bone in some areas and resorption of  
262 bone in others, ultimately causing degenerative joint disease [29].

263         This pathology starts to impact movement at the time of first walking, although  
264 minimal pain would ensue because of the animal's flexibility at its early age. As the joint  
265 cartilage wears out, however, bone would rub on bone. The ensuing forces would make  
266 the bone stiffer, resulting in osteophytes or bone spurs as well as sclerosis that  
267 manifests on CT imaging as increased bone density (Movie S2; Datasets S1-S2). At this  
268 point, loading the limb would cause pain, and range of motion would be limited.  
269 Therefore, the animal examined in this study would have spent as little time as possible  
270 on its right hind leg, needing to compensate for the handicap by increasing the load on  
271 its left hind leg. This compensation would explain the exostoses on the left ilium

272 anterodorsal to the otherwise non-pathologic acetabulum (Figure 1; File S1; Movie S1),  
273 indicating abnormal pulling of the quadriceps femoris muscles originating in this area.

## 274 **Hip dysplasia in modern carnivorans**

275 Hip dysplasia is a heritable, polygenic condition that can affect a range of  
276 mammal species [29], including humans [32–34]. Feline hip dysplasia is reported  
277 clinically relatively rarely [35,36], but canine hip dysplasia (CHD) is one of the most  
278 prevalent orthopedic diseases in domestic dogs [37] and, since it is similar to  
279 developmental dysplasia of the human hip [38], is very well studied.

280 Embryologically, articular joints differentiate from skeletal mesenchyme *in situ*  
281 with the support of surrounding tissues that sustain mechanical and physiological forces  
282 that tend to pull on the joints [29,39]. Dog hip joints are normal at birth, as teratologic  
283 factors and the mechanical stresses that could displace the femoral head are rare at  
284 this time [29]. In humans, fetus positioning—particularly the legs in adduction and  
285 extension—contributes to the development of hip dysplasia; the congruity of the  
286 acetabulum and femoral head is not maintained, making joint laxity more likely [29].  
287 Additionally, suboptimal muscle function may be a major contributor to joint laxity, which  
288 in turn has been postulated to be a major contributor to the characteristic acetabular  
289 and femoral changes observed in hip dysplasia [29].

290 Epiphyseal ossification normally begins by 12 days of age in canines. In canines  
291 that eventually develop CHD, anatomical changes of the femoral head and pelvic socket  
292 begin prior to week three of development [40]. In dysplastic hips, the teres ligament,  
293 which is crucial for holding the femoral head in place, is too short; this produces  
294 luxation, or dislocation, of the top of the femoral head, beginning at around seven weeks

295 of age [29]. This luxation increases throughout development, degrading the articular  
296 cartilage that surrounds the femoral head and delaying ossification of the femur and  
297 acetabulum [29]. Dysplasia also results in shortening of the affected limb, as the femoral  
298 head is positioned higher in the acetabulum.

299 The overall results of these physiologic changes are mechanical imbalance and  
300 instability in the hip joint causing displacement due to opposing forces from the  
301 acetabulum and femoral head, and osteophytes in the acetabulum to compensate for  
302 cartilage loss [29].

### 303 **Hip dysplasia and osteoarthritis in domestic and wild cats**

304 Feline hip dysplasia (FHD) often is not detected clinically in domestic cats  
305 [36,41], possibly because it does not commonly cause overt functional impairment or  
306 because cats are able to compensate for the resulting lameness better than dogs  
307 [42,43]. As a result, much fewer clinical cases of FHD are reported [35,36] in contrast to  
308 cases of CHD [37]. In these cases, osteoarthritis (also known as degenerative joint  
309 disease, or DJD) of the hip secondary to FHD is well known [44]. Osteoarthritis was  
310 recorded in 43 of 45 (95.6%) of cats with FHD [45]. As well, in 5 of 13 (38.5%) cases of  
311 hip osteoarthritis with an identifiable radiographic or historical cause, hip dysplasia was  
312 pinpointed as the cause, with the remaining cases resulting from trauma or equivocal  
313 between trauma and dysplasia [42].

314 Reports of FHD in non-domestic large cats are even rarer than in domestic cats.  
315 Snow leopards in zoologic institutions have exhibited hip dysplasia; across 14 zoos,  
316 seven cases were classified as moderate to severe [46,47]. At least two individual snow  
317 leopards necessitated total hip replacement before being able to breed [46,47]. Beyond

318 snow leopards, accounts of functional impairment in the hip of non-domestic large cats  
319 tend to report osteoarthritis, which can be associated with FHD but may also stem from  
320 trauma and increased age [48–50].

321 For wild-caught large cats, the only comprehensive study of which we are aware  
322 is a survey of 386 individuals (283 wild-caught) across three felid genera mounted as  
323 exhibit skeletons in a range of North American natural history museums [49]. Though  
324 not focusing specifically on hip dysplasia, the study tracked DJD, which may be  
325 associated with hip dysplasia [42,45]. The sample recorded DJD in 9.7% of 31 tigers,  
326 2.3% of 88 African lions, and 5.1% of 59 mountain lions, and none in five other species  
327 of big cat. These frequencies are low compared to domestic cats, perhaps owing to  
328 differences in body size, diet, and lifestyle between large wild cats and domestic cats  
329 [44]. Though this study identified instances of non-inflammatory osteoarthritis in the  
330 shoulder, elbow, and stifle, it found none in the hip. However, 4% of all joints afflicted by  
331 spondyloarthropathy—a form of inflammatory arthritis—comprised the hip [49].

### 332 **Behavioral implications for *Smilodon***

333 Previous workers have inferred social behavior from *Smilodon's* pathologies,  
334 interpreting signs of healing as evidence that the animal continued to live after injury.  
335 Given the severity of many of the injuries, authors argue, the animal would have starved  
336 to death had it not lived within a social structure. The fact that the present pathology  
337 would have manifested from a young age, hindering the animal's ability to hunt prey and  
338 defend territory over the course of its life, is even more indicative of social structure.

339 *Smilodon's* large body size necessitated preying on megaherbivores for  
340 adequate sustenance [3]. To do so, like most large cats today, they would have used

341 their hindlimbs for propulsion and acceleration [51–53]. This pounce behavior would  
342 have been emphasized in *Smilodon*. Its ratio of total forelimb length to total hindlimb  
343 length is greater than those of living felids, while its ratio of tibia length to femur length  
344 ranks lower than those of living felids [14]. The shorter hindlimbs lacking the distal limb  
345 elongation seen in cursorial animals suggest that *Smilodon* was an ambush predator  
346 surpassing the ability of felids today [54]. Hunting large prey is dangerous [55]; after the  
347 initial leap powered by its hindlimbs, *Smilodon* would have grappled with its struggling  
348 prey, as evidenced by traumatic injuries radiating dorsolaterally to where the ribs  
349 articulate with the spine [5]. As it subdued prey with its robust forelimbs [15,52] under  
350 enough torque to injure the lumbar vertebrae [5], *Smilodon* would have needed to  
351 leverage itself against the ground using its hindlimbs. Therefore, the pelvis and femur  
352 would have been critical to multiple phases of *Smilodon*'s hunting strategy.

353         The dysplastic individual would have encountered much difficulty hunting in this  
354 manner. Yet, as evidenced by its large size and by complete fusion of its pelvic and  
355 femoral elements, it had reached adult age. (Studies of the detailed timing of epiphyseal  
356 fusion in large wild cats are lacking, but distal femoral epiphyses fuse at around the  
357 same time as or soon after proximal femoral epiphyses in domestic cats and dogs  
358 [56,57]; given this, the broken distal end likely also had a fused epiphysis.) Adulthood in  
359 *Smilodon* is likely equivalent to at least four years old, given that the forelimb and/or  
360 hindlimb in the African lion completely fuses between 4.5 and 5.5 years of age [58–60];  
361 this is supported by bone histological work quantifying at least four lines of arrested  
362 growth (LAGs; one per growth year) in limb bones with fused epiphyses belonging to  
363 *Smilodon fatalis* from the Talara asphaltic deposits in Peru [61]. Some of the LAGs in



364 the *Smilodon* histological specimens likely have been masked by secondary bone  
365 remodeling [61], which may be more extensive in larger-bodied taxa [62], and these  
366 specimens may be older than the number of visible LAGs suggest; therefore, the  
367 pathologic specimen may be quite a bit older than four years of age.

368 To sustain growth to this age, the animal must have secured prey items without  
369 necessarily hunting them. We propose that this individual, and other critically pathologic  
370 *Smilodon* like it, survived to adulthood by association with a social group that assisted it  
371 with feeding and protection. Evidence for sociality in *Smilodon* historically has been  
372 drawn from three main sources: quantification of sexual dimorphism in the size and  
373 shape of skeletal elements, ontogenetic patterns in teeth and bone, and comparisons of  
374 Rancho La Brea with extant carnivore communities comprising social and solitary  
375 members.

376 Extant large felids are predominantly solitary, with neighboring and often related  
377 females tending to feed cooperatively more often and in larger numbers than males.  
378 The pride-dwelling, male-dominated African lion is the social outlier, though African lion  
379 females aggregate as well [63]. High levels of sexual dimorphism mark the African lion:  
380 males have manes, larger body size, and upper canines 25% larger than in females  
381 [64,65]. Rancho La Brea *Smilodon fatalis* exhibits discernible levels of sexual  
382 dimorphism in its canine teeth but less pronounced than the African lion's, suggesting  
383 that its social structure differed from that of *P. leo* [26]. Instead, *Smilodon* may have  
384 been solitary with females occasionally sharing prey, as is the case for most extant  
385 felids with low craniodental sexual dimorphism; or—if social—then its breeding system  
386 likely differed from those of any large felids today [26].

387           In Rancho La Brea *Smilodon*, levels of sexual dimorphism in overall cranial  
388 shape (though not size) are on par with those in extant pantherine cats, supporting the  
389 existence of a social structure in *Smilodon* [66]. However, pantherines span the social  
390 African lion to the solitary leopard (*Panthera pardus*), and therefore this comparison  
391 generated equivocal support for solitary polygyny or unisexual groups [66]. On the other  
392 hand, sexual dimorphism in various craniodental measurements for *Smilodon fatalis*  
393 from Talara is greater than at RLB and more consistent with sociality; the higher  
394 proportion of females to males at Talara further supports cooperative hunting among  
395 females [61]. Among social carnivorans today, social structure varies by resource level:  
396 larger groups during times of plenty or in the presence of competitors; pairs or  
397 individuals when resources are limited [67,68]. The difference in *Smilodon* sexual  
398 dimorphism between Rancho La Brea and Talara may well reflect true differences in  
399 social structure stemming from differences in competitor density or resource limitation,  
400 which may vary across sites or through time.

401           Ontogenetic growth patterns in teeth and bone support inferences of sociality  
402 from skeletal sexual dimorphism. In *Smilodon*, the teeth appear to mature earlier than  
403 when sutures and long-bone epiphyses fuse. At Rancho La Brea, most sampled  
404 specimens show significant pulp cavity closure of the lower canine (14 of 19 specimens  
405 over approximately 80% closure), a sign of dental maturation [69]. In contrast, RLB  
406 pantherine pulp cavities compared against the *Smilodon* sample were more evenly  
407 distributed across the closure percentage range—suggesting that the asphalt seeps  
408 tended to trap older *Smilodon* or, more likely (because other assessments have yielded  
409 estimates of a full range of ages in *Smilodon* [70]), that teeth mature earlier in *Smilodon*

410 than in pantherines. At Talara, age determination by dentition yields low estimated  
411 counts of juveniles, but age determination based on limb epiphyseal fusion yields 41%  
412 juveniles [61]. Histology of Talara *Smilodon* long bones reinforces this mismatch, as an  
413 apparent adult femur with fused epiphyses and seven LAGs may have been still  
414 growing, based on the lack of avascular and acellular subperiosteal lamellar bone [61].  
415 The lag in maturation between the teeth and the limb bones suggests delayed weaning,  
416 prolonged juvenile dependence, and extended familial care until the full adult hunting  
417 morphology—saber canines and robust limbs—was complete. This social scenario  
418 would help explain how the individual in this current study was able to survive to  
419 adulthood given its debilitating handicap.

420       Lastly, the relatively high abundance of *Smilodon fatalis*—the most abundant  
421 carnivoran at Rancho La Brea, second to the dire wolf—has been interpreted as  
422 evidence for sociality. A full range of ages is present among Rancho La Brea *Smilodon*;  
423 in contrast, animals interpreted to be solitary, such as the American lion *Panthera atrox*,  
424 are represented largely by adult individuals [70]. Furthermore, the proportions of social  
425 and solitary species at Rancho La Brea parallel those drawn to audio playbacks of  
426 herbivore distress calls in the African savanna [24,25]. Extant social felids occur in  
427 higher densities than solitary species, and multiple individuals congregate around fresh  
428 kills; therefore, the high incidence of *S. fatalis* at Rancho La Brea makes sense less if it  
429 were solitary and more so if it were social.

430

## 431 **Conclusions**

432           Novel application of computed tomography to an old question of paleopathology  
433 has enabled diagnosis of hip dysplasia, a lifelong condition, in an individual *Smilodon*  
434 *fatalis* saber-toothed cat, informing the longstanding debate between social and solitary  
435 hypotheses for the behavior of this extinct predator. This individual likely was not the  
436 only *Smilodon* afflicted with hip dysplasia and preserved by the asphalt seeps; at least  
437 one other pelvic specimen—described by Shermis [23]—appears superficially similar to  
438 the pelvis examined in this study, and further study may reveal it to be dysplastic as  
439 well. The individual examined in this study reached adulthood (at least four to seven  
440 years of age) but could never have hunted nor defended territory on its own, given its  
441 locomotor impairment that would have been present since infancy. As such, this  
442 individual likely survived to adulthood by association with a social group that assisted it  
443 with feeding and protection.

444           Further conclusions are limited by the lack of a comprehensive and systematic  
445 comparative dataset comprising pathologic postcranial specimens from extant species,  
446 a persistent limitation of paleopathological studies [5]. Natural history museums may  
447 acquire cranial remains from zoos or similar institutions but often lack storage to  
448 accommodate postcranial skeletons, especially for large carnivores. While radiographic  
449 studies on domestic cats and dogs are informative as to the nature of hip dysplasia,  
450 these studies tend to examine pathologic bones *in situ*, still embedded in a muscular  
451 framework, as opposed to the isolated context in which paleopathological specimens  
452 are found. Computed tomography may be key to building such a dataset in the future.

453           Within the scope of this study, we cannot completely rule out the hypothesis that  
454 the pathologic animal was a scavenger and therefore could have obtained food outside  
455 the context of a social structure. It is also possible that, despite its disability, its large  
456 body size and fearsome canines made it a strong interference competitor. However, the  
457 pathologic specimens that we have examined here in detail are consistent with the  
458 predominance of studies supporting a spectrum of social strategies in this extinct  
459 predator. In many extant carnivores, sociality offers the benefits of cooperative hunting  
460 and cooperative rearing of young [71]. These benefits likely also applied to the extinct  
461 *Smilodon* in the late Pleistocene. As *Smilodon* coexisted with a rich megafaunal  
462 carnivore assemblage including dire wolves, American lions, and short-faced bears,  
463 cooperative sociality may have aided its success as a predator in a crowded field.

464

## 465 **Acknowledgements**

466           We thank Aisling Farrell at La Brea Tar Pits and Museum for facilitating specimen  
467 loans; CT segmentation specialists at the S. Mark Taper Foundation Imaging Center for  
468 CT-scanning specimens; Jeff Busey and Jessica Butler at Zimmer Biomet for aiding  
469 design of 3D models; and Alexis Mychajliw, Karin Rice, and Blaire Van Valkenburgh for  
470 comments and constructive discussion.

471

## 472 **References**

- 473 1.     Werdelin L, McDonald HG, Shaw CA, editors. *Smilodon: The Iconic Sabertooth*.  
474         Baltimore, MD: Johns Hopkins University Press; 2018.

- 475 2. Spencer LM, Van Valkenburgh B, Harris JM. Taphonomic analysis of large  
476 mammals recovered from the Pleistocene Rancho La Brea tar seeps.  
477 *Paleobiology*. 2003;29: 561–575.
- 478 3. Van Valkenburgh B, Hayward MW, Ripple WJ, Meloro C, Roth VL. The impact of  
479 large terrestrial carnivores on Pleistocene ecosystems. *Proc Natl Acad Sci*.  
480 2016;113: 862–867. doi:10.1073/pnas.1502554112
- 481 4. DeSantis LRG, Crites JM, Feranec RS, Fox-Dobbs K, Farrell AB, Harris JM, et al.  
482 Causes and consequences of Pleistocene megafaunal extinctions as revealed  
483 from Rancho La Brea mammals. *Curr Biol*. 2019;29: 2488-2495.e2.  
484 doi:10.1016/j.cub.2019.06.059
- 485 5. Brown C, Balisi M, Shaw CA, Van Valkenburgh B. Skeletal trauma reflects  
486 hunting behaviour in extinct sabre-tooth cats and dire wolves. *Nat Ecol Evol*.  
487 2017;1: 1–7. doi:10.1038/s41559-017-0131
- 488 6. Rubin CT. Skeletal strain and the functional significance of bone architecture.  
489 *Calcif Tissue Int*. 1984;36: 11–18. doi:10.1007/BF02406128
- 490 7. Burr DB, Martin RB, Schaffler MB, Radin EL. Bone remodeling in response to in  
491 vivo fatigue microdamage. *J Biomech*. 1985;18: 189–200. doi:10.1016/0021-  
492 9290(85)90204-0
- 493 8. Martin RB. Fatigue damage, remodeling, and the minimization of skeletal weight.  
494 *J Theor Biol*. 2003;220: 271–276. doi:10.1006/jtbi.2003.3148
- 495 9. Taylor D, Hazenberg JG, Lee TC. Living with cracks: Damage and repair in  
496 human bone. *Nat Mater*. 2007;6: 263–268. doi:10.1038/nmat1866
- 497 10. Eisenberg JF. The social organisation of mammals. *Handb der Zool*. 1966;10: 1–

- 498 92.
- 499 11. Christiansen P, Harris JM. Body size of Smilodon (Mammalia: Felidae). *J*  
500 *Morphol.* 2005;266: 369–384. doi:10.1002/jmor.10384
- 501 12. Anyonge W. Body mass in large extant and extinct carnivores. *J Zool.* 1993;231:  
502 339–350.
- 503 13. Torregrosa V, Petrucci M, Pérez-Claros JA, Palmqvist P. Nasal aperture area and  
504 body mass in felids: Ecophysiological implications and paleobiological inferences.  
505 *Geobios.* 2010;43: 653–661. doi:10.1016/j.geobios.2010.05.001
- 506 14. Gonyea WJ. Behavioral implications of saber-toothed felid morphology.  
507 *Paleobiology.* 1976;2: 332–342.
- 508 15. Meachen-Samuels JA. Morphological convergence of the prey-killing arsenal of  
509 sabertooth predators. *Paleobiology.* 2012;38: 1–14. doi:10.5061/dryad.h58q6
- 510 16. Schaller GB. *The Serengeti lion: a study of predator-prey relations.* University of  
511 Chicago Press; 1972.
- 512 17. Karanth KU, Sunquist ME. Behavioural correlates of predation by tiger (*Panthera*  
513 *tigris*), leopard (*Panthera pardus*), and dhole in Nagarahole, India. *J Zool London.*  
514 2000;250: 255–265.
- 515 18. Radinsky LB. Evolution of the felid brain. *Brain Behav Evol.* 1975;11: 214–254.  
516 doi:10.1159/000123635
- 517 19. McCall S, Naples V, Martin LD. Assessing behavior in extinct animals: Was  
518 Smilodon social? *Brain Behav Evol.* 2003;61: 159–164. doi:10.1159/000069752
- 519 20. Kiffner C. Coincidence or evidence: was the sabretooth cat Smilodon social? *Biol*  
520 *Lett.* 2009;5: 561–562. doi:10.2307/5647

- 521 21. Pérez-Barbería FJ, Shultz S, Dunbar RIM. Evidence for coevolution of sociality  
522 and relative brain size in three orders of mammals. *Evolution* (N Y). 2007;61:  
523 2811–2821. doi:10.1111/j.1558-5646.2007.00229.x
- 524 22. Moodie RL. Pleistocene luxations. *Am J Surg*. 1930;IX: 348–362.
- 525 23. Shermis S. Healed massive pelvic fracture in a *Smilodon* from Rancho La Brea,  
526 California. *Paleobios*. 1983;1: 121–126.
- 527 24. Carbone C, Maddox T, Funston PJ, Mills MGL, Grether GF, Van Valkenburgh B.  
528 Parallels between playbacks and Pleistocene tar seeps suggest sociality in an  
529 extinct sabretooth cat, *Smilodon*. *Biol Lett*. 2009;5: 81–85.  
530 doi:10.1098/rsbl.2008.0526
- 531 25. Van Valkenburgh B, Maddox T, Funston PJ, Mills MGL, Grether GF, Carbone C.  
532 Sociality in Rancho La Brea *Smilodon*: arguments favour ‘evidence’ over  
533 ‘coincidence.’ *Biol Lett*. 2009;5: 563–564. doi:10.1098/rsbl.2009.0261
- 534 26. Van Valkenburgh B, Sacco T. Sexual dimorphism, social behavior, and  
535 intrasexual competition in large Pleistocene carnivorans. *J Vertebr Paleontol*.  
536 2002;22: 164–169. doi:10.1671/0272-4634(2002)022[0164:SDSBAI]2.0.CO;2
- 537 27. Shaw CA, Ware CS. *Smilodon* paleopathology: a summary of research at Rancho  
538 La Brea. In: Werdelin L, McDonald HG, Shaw CA, editors. *Smilodon: The Iconic*  
539 *Sabertooth*. Baltimore: Johns Hopkins University Press; 2018.
- 540 28. Fuller BT, Harris JM, Farrell AB, Takeuchi GT, Southon JR. Sample preparation  
541 for radiocarbon dating and isotopic analysis of bone from Rancho La Brea. *Nat*  
542 *Hist Museum Los Angeles Cty Sci Ser*. 2015;42: 151–167.
- 543 29. Riser WH, Rhodes WH, Newton CD. Hip dysplasia. *Textbook of Small Animal*



- 544 Orthopaedics. J.B. Lippincott Company; 1985.
- 545 30. Creel R. Congenital hip dysplasia. Iowa State Univ Vet. 1961;23: 32–33.
- 546 doi:10.1097/00006416-198705000-00011
- 547 31. Peterson C. Canine hip dysplasia: Pathogenesis, phenotypic scoring, and
- 548 genetics. Duluth J Undergrad Biol. 2017;4: 19–27. Available:
- 549 <https://pubs.lib.umn.edu/index.php/djub/article/view/33>
- 550 32. Ortolani M. Congenital hip dysplasia in the light of early and very early diagnosis.
- 551 Clin Orthop Relat Res. 1976;No.119: 6–10. doi:10.1097/00003086-197609000-
- 552 00003
- 553 33. Graf R. Fundamentals of sonographic diagnosis of infant hip dysplasia. J Pediatr
- 554 Orthop. 1984;4: 735–740. doi:10.1097/01241398-198411000-00015
- 555 34. Weinstein SL. Natural history of congenital dislocation and dysplasia. Clin Orthop
- 556 Relat Res. 1987;225: 62–76.
- 557 35. Holt PE. Hip dysplasia in a cat. J Small Anim Pract. 1978;19: 273–276.
- 558 doi:10.1111/j.1748-5827.1978.tb05490.x
- 559 36. Patsikas MN, Papazoglou LG, Komninou A, Dessiris AK, Tsimopoulos G. Hip
- 560 dysplasia in the cat: A report of three cases. J Small Anim Pract. 1998;39: 290–
- 561 294. doi:10.1111/j.1748-5827.1998.tb03653.x
- 562 37. Bartolomé N, Segarra S, Artieda M, Francino O, Sánchez E, Szczypiorska M, et
- 563 al. A genetic predictive model for canine hip dysplasia: integration of Genome
- 564 Wide Association Study (GWAS) and candidate gene approaches. PLoS One.
- 565 2015;10: 1–13. doi:10.1371/journal.pone.0122558
- 566 38. Zhou Z, Sheng X, Zhang Z, Zhao K, Zhu L, Guo G, et al. Differential genetic

- 567 regulation of canine hip dysplasia and osteoarthritis. PLoS One. 2010;5.  
568 doi:10.1371/journal.pone.0013219
- 569 39. Bollet AJ. The biology of degenerative joint disease. In: Sokoloff L, editor. Arthritis  
570 & Rheumatism. Chicago: University of Chicago Press; 1969. pp. 144–162.
- 571 40. Kealy RD, Lawler DF, Ballam JM, Lust G, Biery DN, Smith GK, et al. Evaluation of  
572 the effect of limited food consumption on radiographic evidence of osteoarthritis in  
573 dogs. J Am Vet Med Assoc. 2000;217: 1678–1680.  
574 doi:10.2460/javma.2000.217.1678
- 575 41. Clarke SP, Bennett D. Feline osteoarthritis: A prospective study of 28 cases. J  
576 Small Anim Pract. 2006;47: 439–445. doi:10.1111/j.1748-5827.2006.00143.x
- 577 42. Clarke SP, Mellor D, Clements DN, Gemmill T, Farrell M, Carmicheal S, et al.  
578 Prevalence of radiographic signs of degenerative joint disease in a hospital  
579 population of cats. Vet Rec. 2005;157: 793–799. doi:10.1136/vr.157.25.793
- 580 43. Perry K. Feline hip dysplasia: A challenge to recognise and treat. J Feline Med  
581 Surg. 2016;18: 203–218. doi:10.1177/1098612X16631227
- 582 44. Lascelles BDX. Feline degenerative joint disease. Vet Surg. 2010;39: 2–13.  
583 doi:10.1111/j.1532-950X.2009.00597.x
- 584 45. Keller GG, Reed AL, Lattimer JC, Corley EA. Hip dysplasia: A feline population  
585 study. Vet Radiol Ultrasound. 1999;40: 460–464. doi:10.1111/j.1740-  
586 8261.1999.tb00375.x
- 587 46. Wharton D, Mainka SA. Management and husbandry of the snow leopard *Uncia*  
588 *uncia*. Int Zoo Yearb. 1997;35: 139–147. doi:10.1111/j.1748-1090.1997.tb01203.x
- 589 47. Suedmeyer WK, Cook JL, Tomlinson JL, Crouch DT. Bilateral total hip

- 590 replacement in a snow leopard (*Uncia uncia*) with bilateral hip dysplasia.  
591 International Association for Aquatic Animal Medicine. 2000.
- 592 48. Whiteside DP, Remedios AM, Black SR, Finn-Bodner ST. Meloxicam and surgical  
593 denervation of the coxofemoral joint for the treatment of degenerative  
594 osteoarthritis in a Bengal tiger (*Panthera tigris tigris*). *J Zoo Wildl Med*. 2006;37:  
595 416–419. doi:10.1638/05-078.1
- 596 49. Rothschild BM, Rothschild C, Woods RJ. Inflammatory arthritis in large cats: An  
597 expanded spectrum of spondyloarthropathy. *J Zoo Wildl Med*. 2010;29: 279–284.
- 598 50. Napier JE, Lund MS, Armstrong DL, McAloose D. A retrospective study of  
599 morbidity and mortality in the North American Amur leopard (*Panthera pardus*  
600 *orientalis*) population in zoologic institutions from 1992 to 2014. *J Zoo Wildl Med*.  
601 2018;49: 70–78. doi:10.1638/2017-0019r2.1
- 602 51. Harris MA, Steudel K. Ecological correlates of hind-limb length in the Carnivora.  
603 *Journal of Zoology*. 1997. pp. 381–408. doi:10.1111/j.1469-7998.1997.tb01966.x
- 604 52. Meachen-Samuels JA, van Valkenburgh B. Radiographs reveal exceptional  
605 forelimb strength in the sabertooth cat, *Smilodon fatalis*. *PLoS One*. 2010;5.  
606 doi:10.1371/journal.pone.0011412
- 607 53. Martín-Serra A, Figueirido B, Palmqvist P. A three-dimensional analysis of the  
608 morphological evolution and locomotor behaviour of the carnivoran hind limb.  
609 *BMC Evol Biol*. 2014;14: 1–13. doi:10.1186/1471-2148-14-129
- 610 54. Anyonge W. Locomotor behaviour in Plio-Pleistocene sabre-tooth cats: a  
611 biomechanical analysis. *J Zool*. 1996;238: 395–413.
- 612 55. Carbone C, Teacher A, Rowcliffe JM. The costs of carnivory. *PLoS Biol*. 2007;5:

- 613 363–368. doi:10.1371/journal.pbio.0050022
- 614 56. Sumner-Smith G. Observations on epiphyseal fusion of the canine appendicular  
615 skeleton. *J Small Anim Pract.* 1966;7: 303–311. doi:10.1111/j.1748-  
616 5827.1966.tb04447.x
- 617 57. Smith RN. Fusion of ossification centres in the cat. *J Small Anim Pract.* 1969;10:  
618 523–530. doi:10.1111/j.1748-5827.1969.tb04071.x
- 619 58. Smuts GL, Robinson GA, Whyte IJ. Comparative growth of wild male and female  
620 lions (*Panthera leo*). *J Zool.* 1980;190: 365–373. doi:10.1111/j.1469-  
621 7998.1980.tb01433.x
- 622 59. Kirberger RM, du Plessis WM, Turner PH. Radiologic anatomy of the normal  
623 appendicular skeleton of the lion (*Panthera leo*). Part 1: thoracic limb. *J Zoo Wildl*  
624 *Med.* 2005;36: 29–35. doi:10.1638/03-013
- 625 60. Kirberger RM, du Plessis WM, Turner PH. Radiologic anatomy of the normal  
626 appendicular skeleton of the lion (*Panthera leo*). Part 2: pelvic limb. *J Zoo Wildl*  
627 *Med.* 2005;36: 29–35. doi:10.1638/03-013
- 628 61. Seymour KL, Reynolds AR, Churcher CS. *Smilodon fatalis* from Talara, Peru:  
629 Sex, age, mass, and histology. In: Werdelin L, McDonald HG, Shaw C, editors.  
630 *Smilodon: The Iconic Sabertooth*. Baltimore, MD: Johns Hopkins University Press;  
631 2018.
- 632 62. Straehl FR, Scheyer TM. Evolutionary patterns of bone histology and bone  
633 compactness in xenarthran mammal long bones. *PLoS One.* 2013;8: 1–19.  
634 doi:10.1371/journal.pone.0069275
- 635 63. Kitchener A. *The Natural History of the Wild Cats*. Ithaca, NY: Cornell University

- 636 Press; 1991.
- 637 64. Smuts GL, Anderson JL, Austin JC. Age determination of the African lion  
638 (Panthera leo). J Zool. 1978;185: 115–146. doi:10.1111/j.1469-  
639 7998.1978.tb03317.x
- 640 65. Gittleman JL, Van Valkenburgh B. Sexual dimorphism in the canines and skulls of  
641 carnivores: effects of size, phylogeny, and behavioural ecology. J Zool. 1997;242:  
642 97–117.
- 643 66. Christiansen P, Harris JM. Variation in craniomandibular morphology and sexual  
644 dimorphism in pantherines and the sabercat *Smilodon fatalis*. PLoS One. 2012;7.  
645 doi:10.1371/journal.pone.0048352
- 646 67. Gese EM, Rongstad OJ, Mytton WR. Relationship between coyote group size and  
647 diet in southeastern Colorado. J Wildl Manage. 1988;52: 647–653.
- 648 68. Arjo WM, Pletscher DH. Behavioral responses of coyotes to wolf recolonization in  
649 northwestern Montana. Can J Zool. 1999;77: 1919–1927. doi:10.1139/z99-177
- 650 69. Meachen-Samuels JA, Binder WJ. Sexual dimorphism and ontogenetic growth in  
651 the American lion and sabertoothed cat from Rancho La Brea. J Zool. 2010;280:  
652 271–279. doi:10.1111/j.1469-7998.2009.00659.x
- 653 70. Miller GJ. On the distribution of *Smilodon californicus* Bovard from Rancho La  
654 Brea. Los Angeles Cty Museum Contrib Sci. 1968;131: 1–19.
- 655 71. Macdonald DW. The ecology of carnivore social behaviour. Nature. 1983;301:  
656 379–384. doi:10.1016/0169-5347(89)90147-x  
657  
658

## 659 **Supporting Information**

660

661 **Movie S1.** A video movie of a structured light surface scan of LACMHC 131, the  
662 pathologic pelvis belonging to *Smilodon fatalis*. Movie created in Adobe Photoshop CC  
663 by Carrie Howard.

664

665 **Movie S2.** A video scrolling anteroposteriorly through LACMHC 131, the pathologic  
666 pelvis belonging to *Smilodon fatalis*. Ventral is at top. Video created by Carrie Howard  
667 from CT scans generated at the S. Mark Taper Foundation Imaging Center at Cedars  
668 Sinai Medical Group.

669

670 **File S1.** Three-dimensional PDF of the pathologic pelvis (LACMHC 131) and femur  
671 (LACMHC 6963).

672

673 **Dataset S1.** Compressed zip file containing the full computed tomography scan of  
674 LACMHC 131, the pathologic pelvis.

675

676 **Dataset S2.** Compressed zip file containing the full computed tomography scan of  
677 LACMHC 6963, the pathologic femur.

678

679 **Dataset S3.** Compressed zip file containing the full computed tomography scan of  
680 LACMHC K-3232, the non-pathologic right femur.



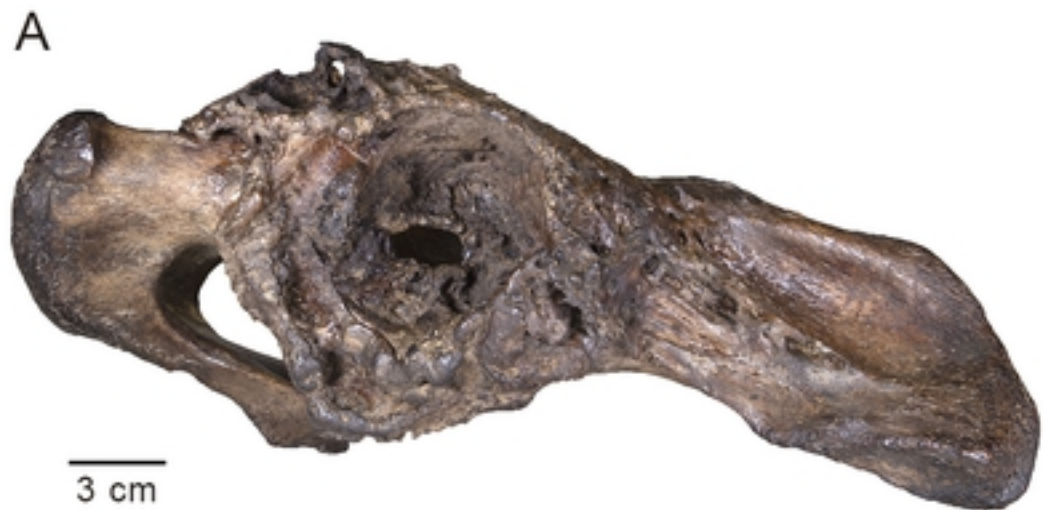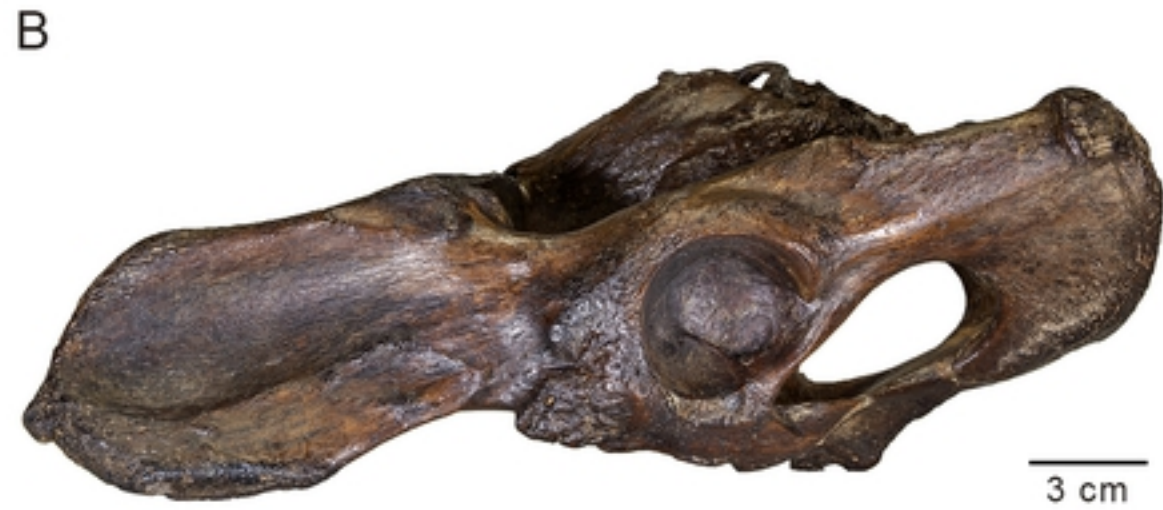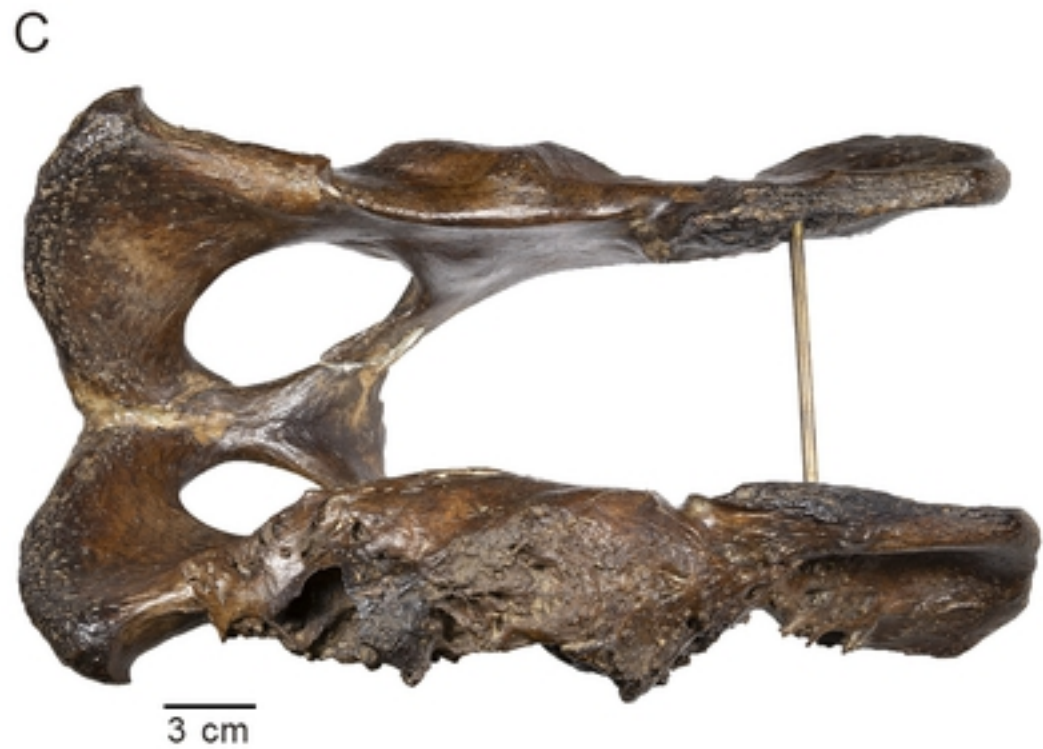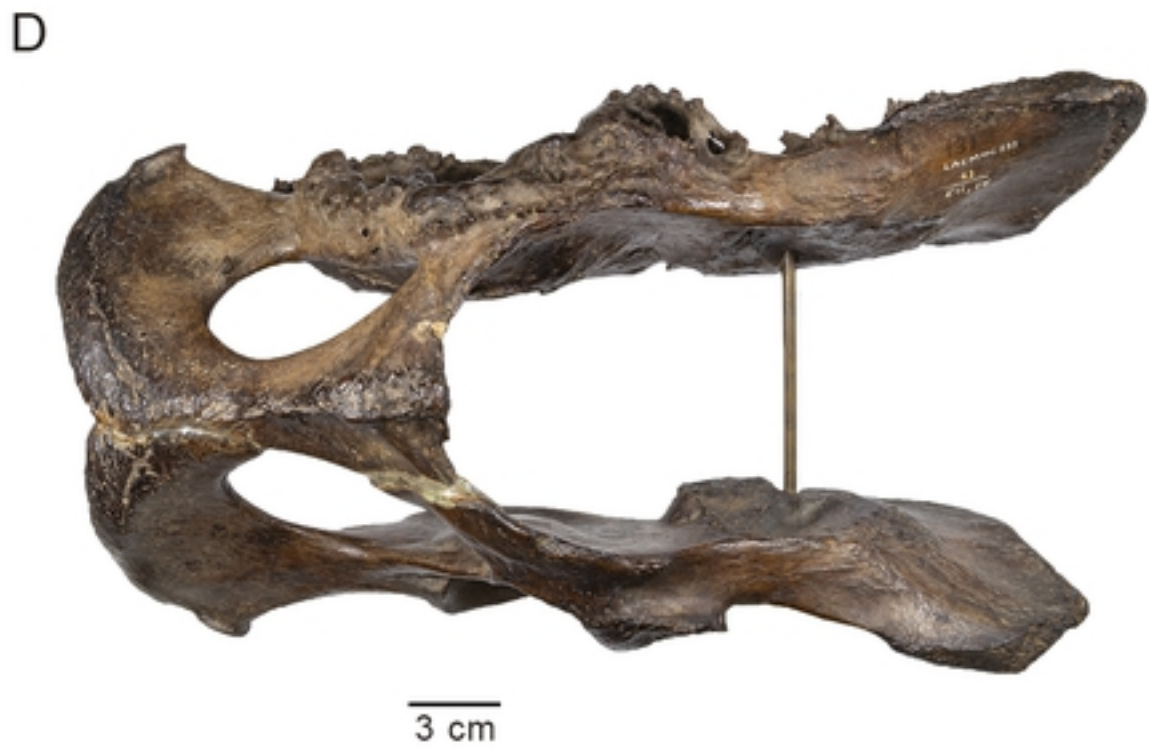

Figure 1



A

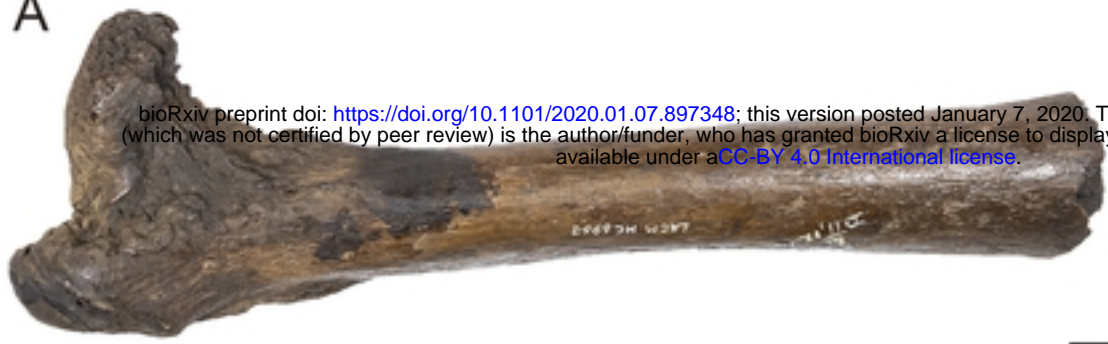

B

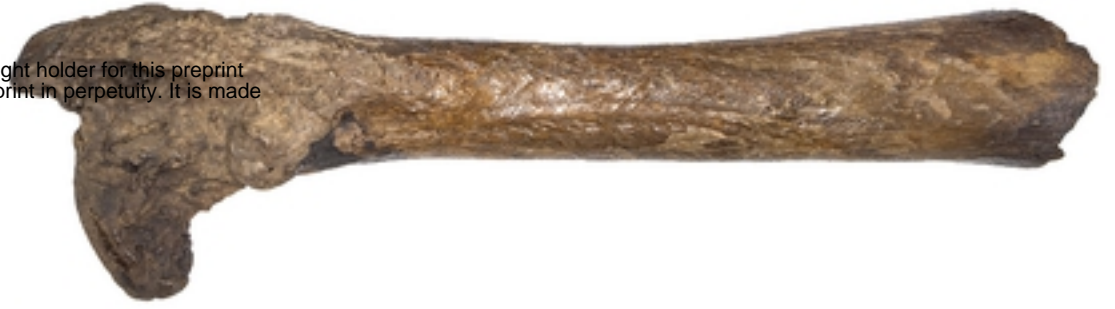

C

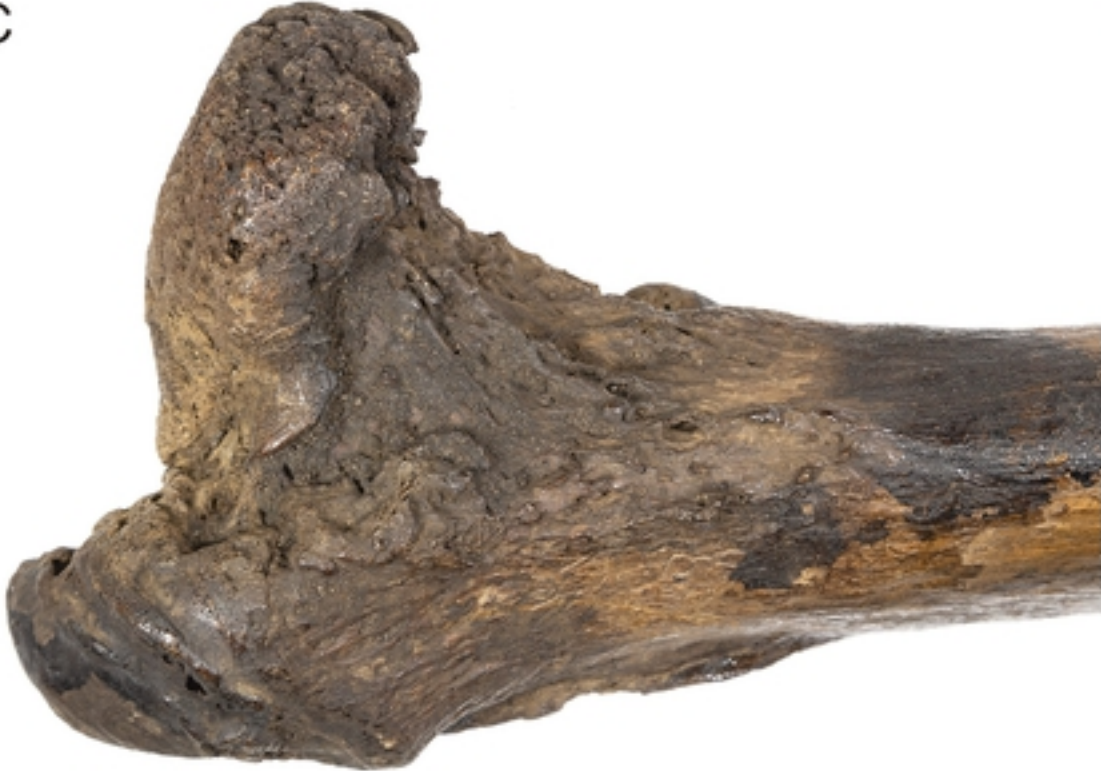

D

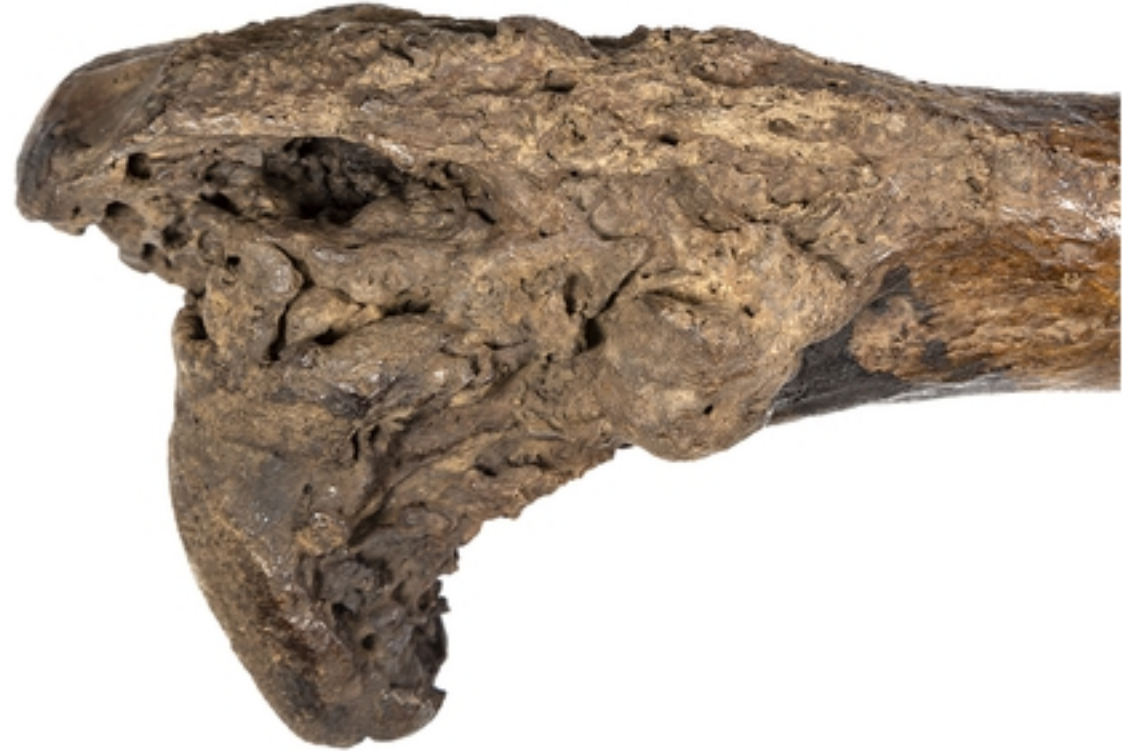

E

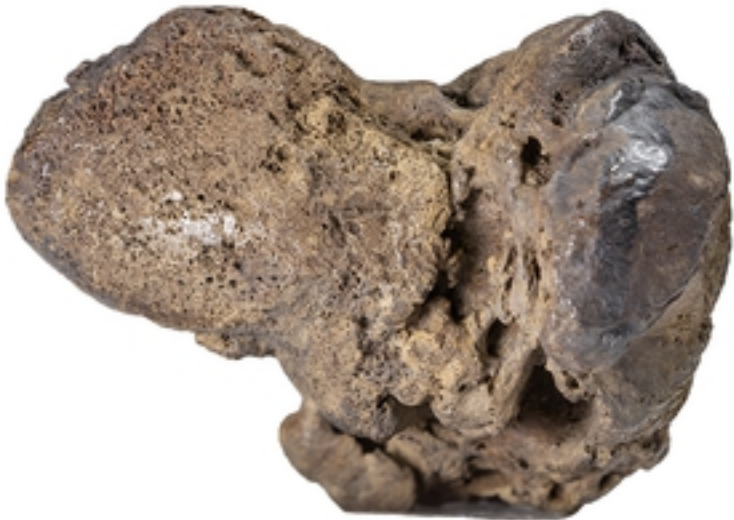

F

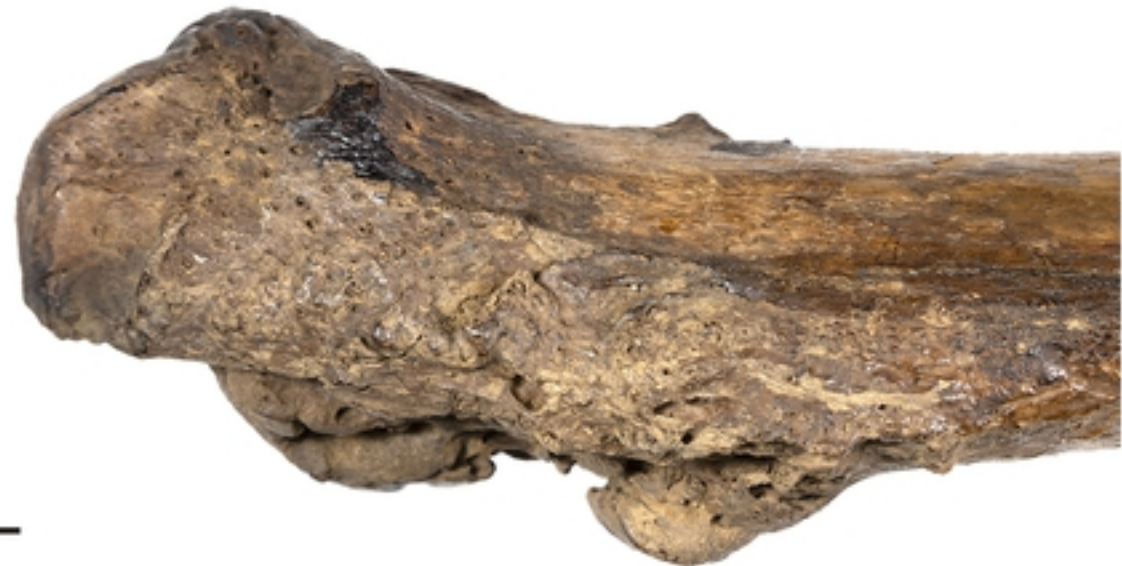

Figure 2



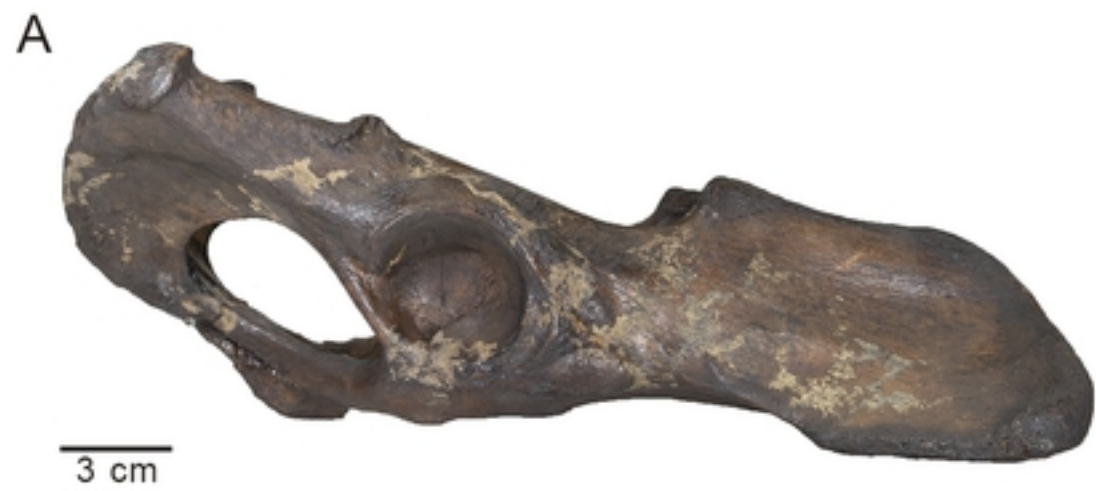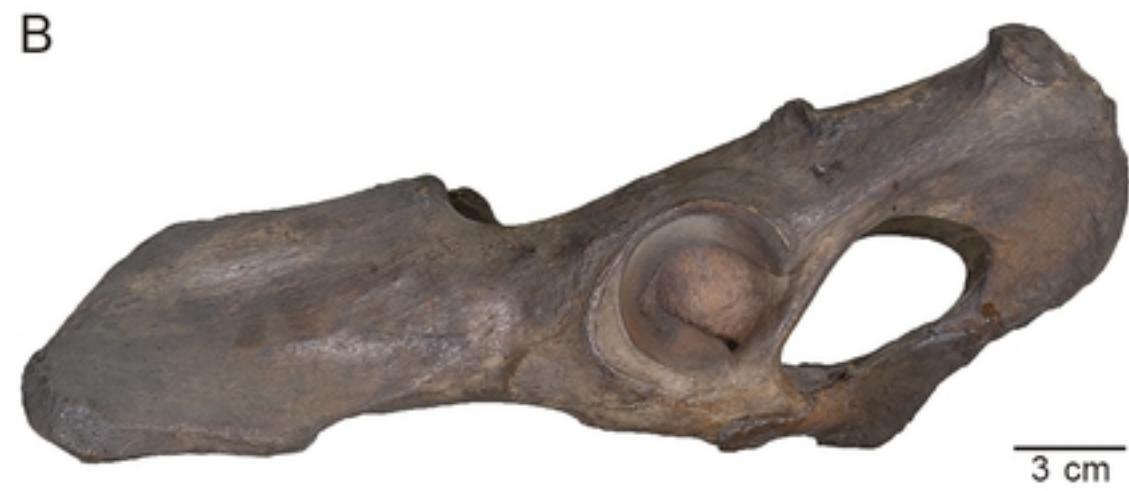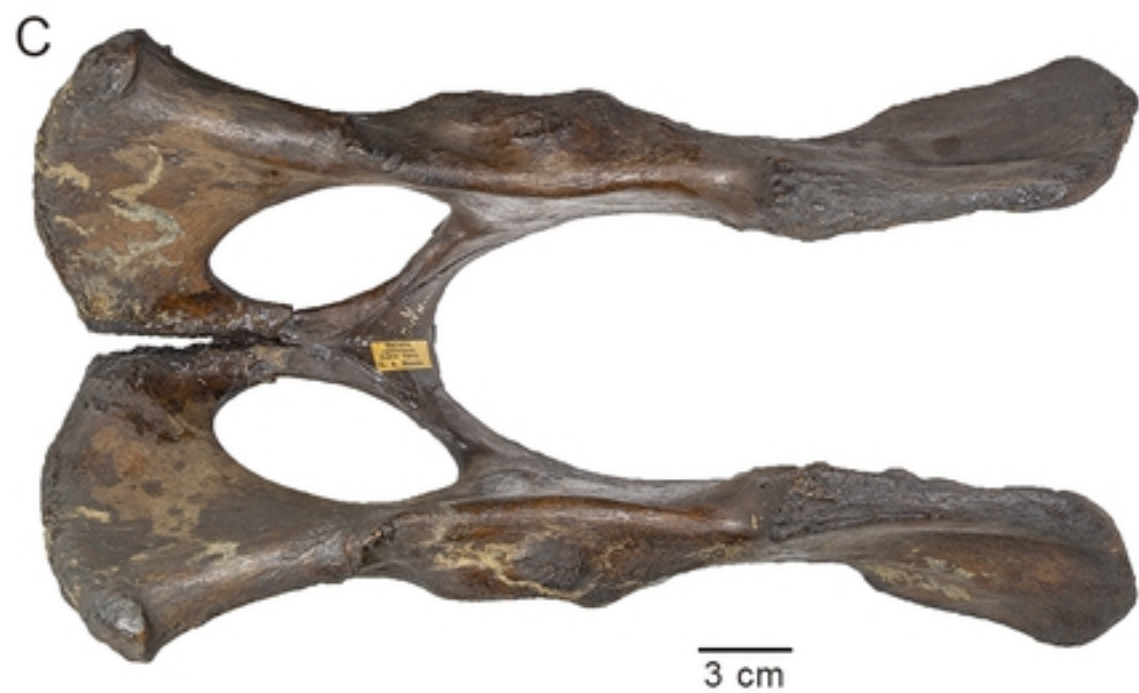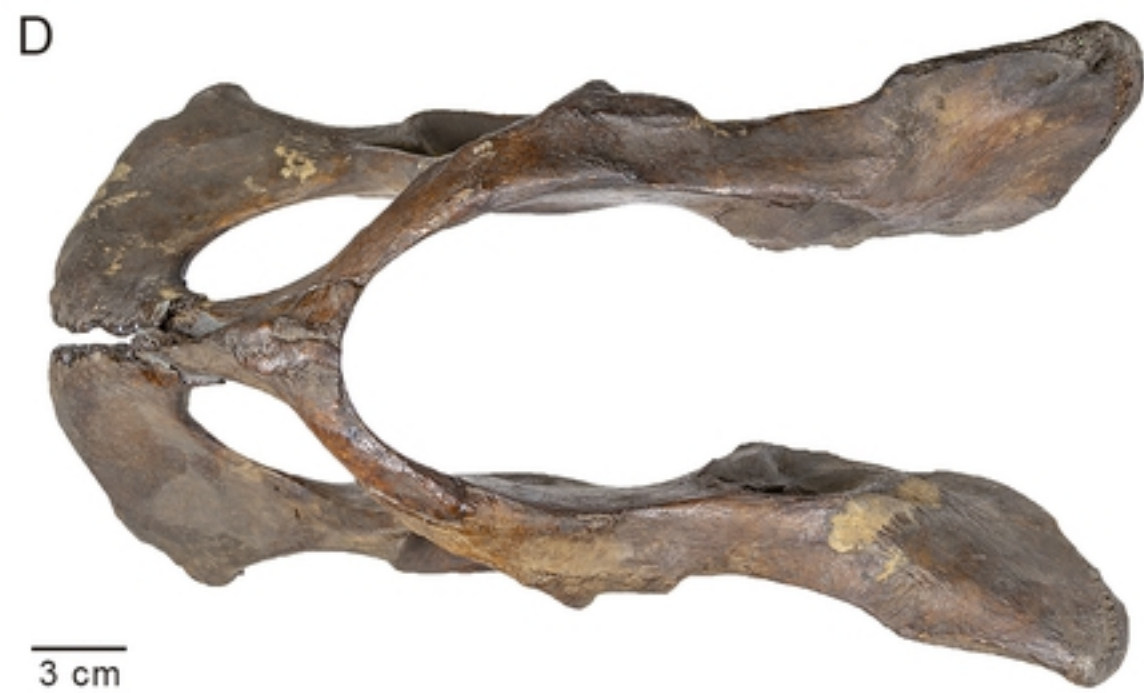

Figure 3

A

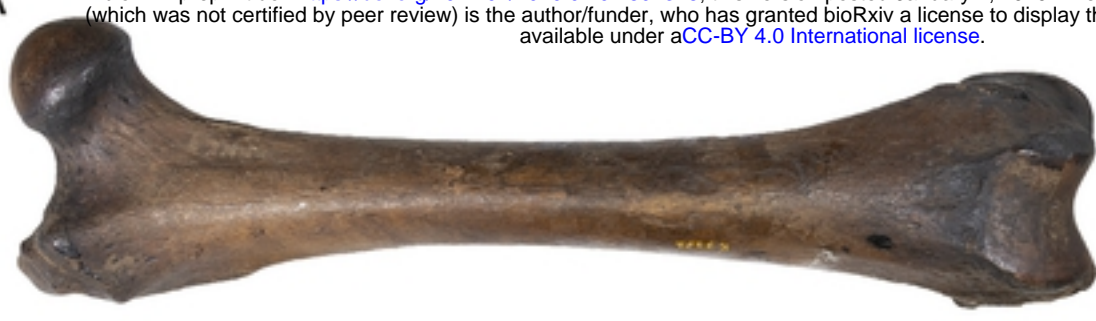

B

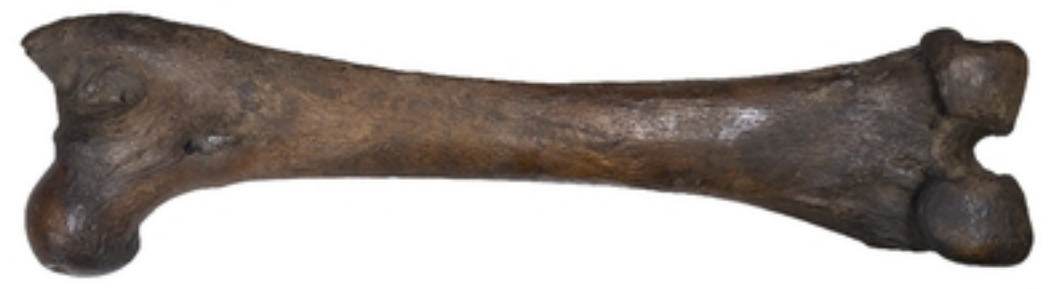

3 cm

C

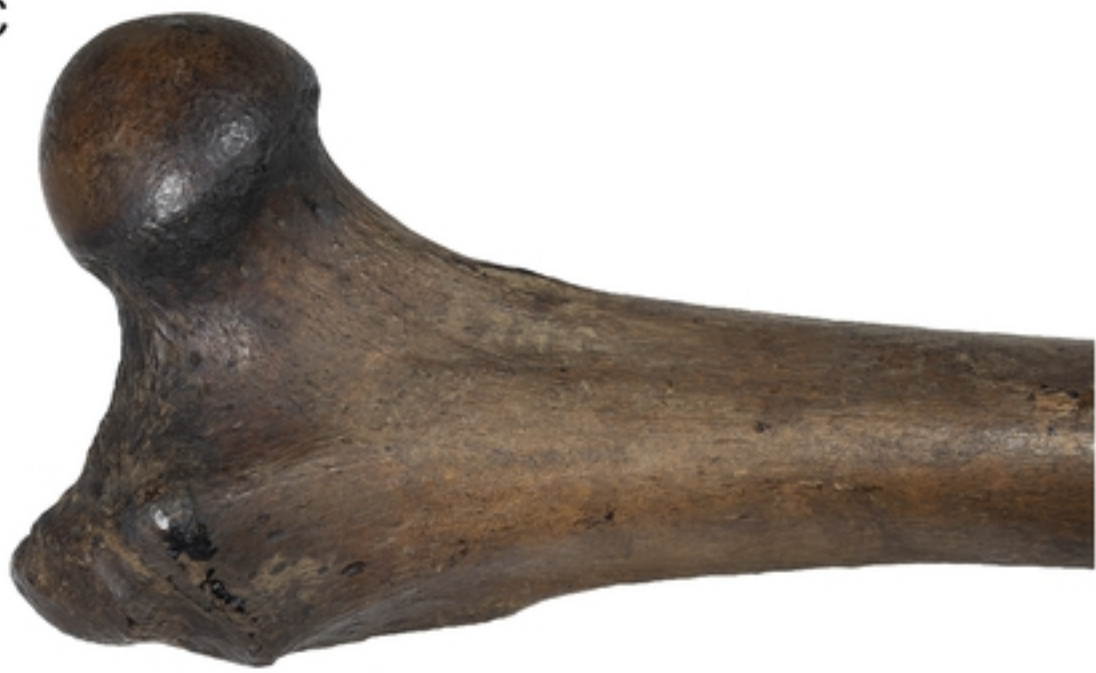

D

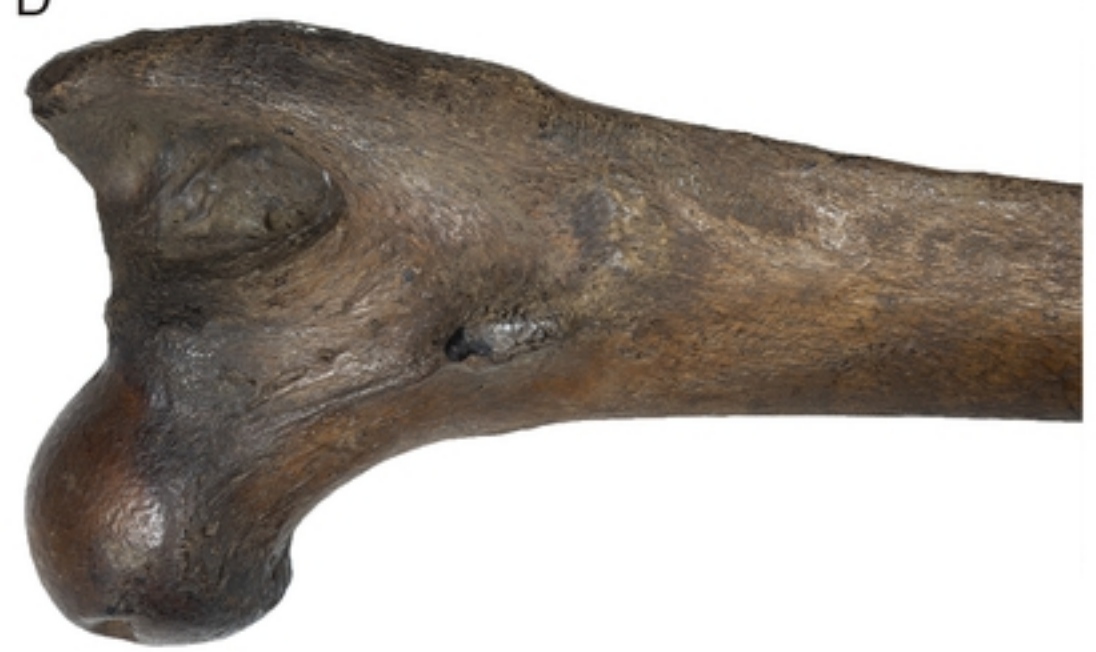

E

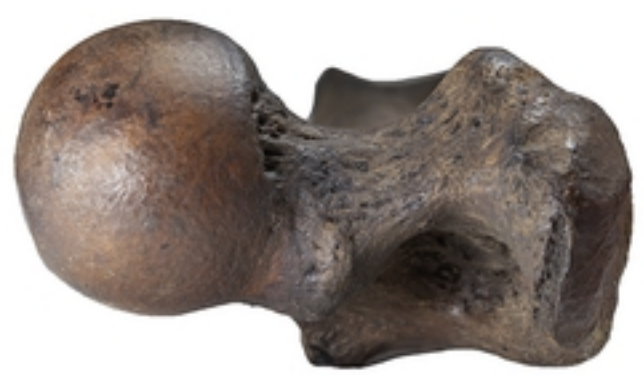

F

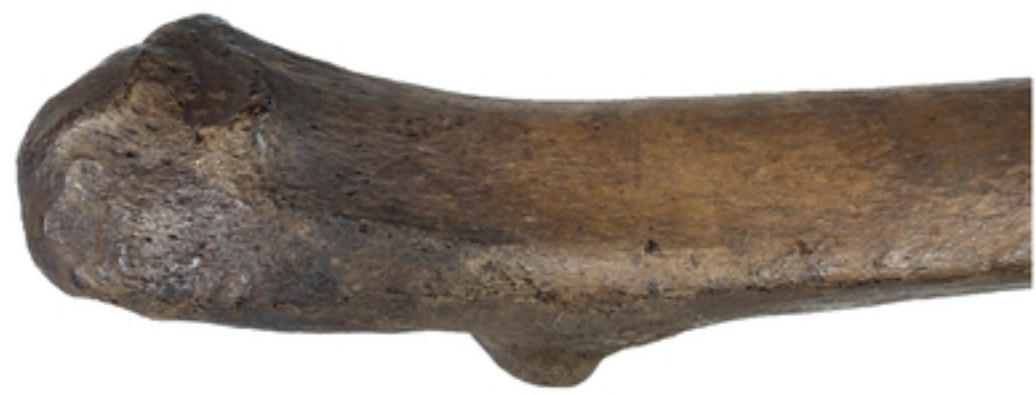

3 cm

Figure 4
